# Supplementary material for: Physiological, Biochemical, Epigenetic and Molecular Analyses of Wheat (Triticum aestivum) Genotypes with Contrasting Salt Tolerance
Source: PubMed Central journal article supplement (PMC5491648; doi:10.3389/fpls.2017.01151), 2017-06-30
Supplement: Data_Sheet_1.pdf [file Data_Sheet_1.pdf]

**Supplementary Table S1.** Malondialdehyde level (lipid peroxidation) and total chlorophyll content in shoot under control and salt stressed condition (0, 50, 100, 150, 200, 250 and 300 mM NaCl) in contrasting wheat genotypes at 0, 3, 6, 9, 12, 14 and 16 days after treatment (DAT).

| Genotype       | Salinity levels (mM NaCl) |       |       |       |       |       |       |                               |       |       |       |       |       |       |
|----------------|---------------------------|-------|-------|-------|-------|-------|-------|-------------------------------|-------|-------|-------|-------|-------|-------|
|                | 0                         | 50    | 100   | 150   | 200   | 250   | 300   | 0                             | 50    | 100   | 150   | 200   | 250   | 300   |
| DAT            | MDA level (nM)            |       |       |       |       |       |       | Chlorophyll content (mg/g FW) |       |       |       |       |       |       |
| <b>KRL-210</b> |                           |       |       |       |       |       |       |                               |       |       |       |       |       |       |
| 3              | 0.047                     | 0.047 | 0.048 | 0.049 | 0.051 | 0.053 | 0.056 | 2.77                          | 2.65  | 2.57  | 2.50  | 2.48  | 2.45  | 2.41  |
| 6              | 0.046                     | 0.047 | 0.049 | 0.051 | 0.053 | 0.055 | 0.057 | 2.75                          | 2.63  | 2.55  | 2.48  | 2.46  | 2.41  | 2.35  |
| 9              | 0.046                     | 0.047 | 0.050 | 0.053 | 0.055 | 0.057 | 0.060 | 2.76                          | 2.59  | 2.53  | 2.45  | 2.43  | 2.35  | 2.30  |
| 12             | 0.047                     | 0.048 | 0.051 | 0.054 | 0.057 | 0.060 | 0.065 | 2.76                          | 2.57  | 2.51  | 2.42  | 2.40  | 2.30  | 2.25  |
| 14             | 0.047                     | 0.049 | 0.053 | 0.056 | 0.060 | 0.065 | 0.071 | 2.75                          | 2.55  | 2.48  | 2.38  | 2.33  | 2.25  | 2.17  |
| 16             | 0.046                     | 0.050 | 0.055 | 0.061 | 0.067 | 0.072 | NA    | 2.75                          | 2.51  | 2.45  | 2.32  | 2.25  | 2.18  | NA    |
| <b>HD-2329</b> |                           |       |       |       |       |       |       |                               |       |       |       |       |       |       |
| 3              | 0.047                     | 0.048 | 0.049 | 0.050 | 0.052 | 0.055 | 0.059 | 0.335                         | 0.334 | 0.321 | 0.294 | 0.288 | 0.272 | 0.266 |
| 6              | 0.048                     | 0.048 | 0.050 | 0.052 | 0.056 | 0.057 | 0.065 | 0.334                         | 0.333 | 0.317 | 0.287 | 0.282 | 0.267 | 0.256 |
| 9              | 0.048                     | 0.048 | 0.051 | 0.056 | 0.063 | 0.064 | 0.076 | 0.335                         | 0.332 | 0.302 | 0.280 | 0.274 | 0.259 | 0.247 |
| 12             | 0.047                     | 0.048 | 0.052 | 0.059 | 0.068 | 0.075 | NA    | 0.334                         | 0.331 | 0.289 | 0.271 | 0.262 | 0.248 | NA    |
| 14             | 0.047                     | 0.049 | 0.054 | 0.062 | 0.076 | NA    | NA    | 0.335                         | 0.327 | 0.278 | 0.264 | 0.247 | NA    | NA    |
| 16             | 0.048                     | 0.051 | 0.061 | 0.075 | NA    | NA    | NA    | 0.335                         | 0.321 | 0.261 | 0.249 | NA    | NA    | NA    |

The values are mean of three replications. NA = Sample not available, because the plant could not survive under the stress condition.

**Supplementary Table S2.** Membrane stability index of shoot and root tissues of wheat genotypes under control and salt (200 mM NaCl) stress conditions 14 days after treatment.

| Genotype     | Membrane stability index |                              |                   |
|--------------|--------------------------|------------------------------|-------------------|
|              | Control                  | Salt stress<br>(200 mM NaCl) | Response<br>(%)   |
| <b>Shoot</b> |                          |                              |                   |
| Kharchia-65  | 87.9 <sup>b</sup>        | 78.3 <sup>b</sup>            | 11 <sup>a</sup> ↓ |
| KRL-210      | 86.9 <sup>b</sup>        | 75.6 <sup>b</sup>            | 13 <sup>a</sup> ↓ |
| HD-2329      | 81.4 <sup>a</sup>        | 66.5 <sup>a</sup>            | 18 <sup>b</sup> ↓ |
| WH-542       | 82.5 <sup>a</sup>        | 68.4 <sup>a</sup>            | 17 <sup>b</sup> ↓ |
| <b>Root</b>  |                          |                              |                   |
| Kharchia-65  | 68.2 <sup>b</sup>        | 55.3 <sup>b</sup>            | 19 <sup>a</sup> ↓ |
| KRL-210      | 67.5 <sup>b</sup>        | 53.3 <sup>b</sup>            | 21 <sup>a</sup> ↓ |
| HD-2329      | 56.8 <sup>a</sup>        | 42.7 <sup>a</sup>            | 25 <sup>b</sup> ↓ |
| WH-542       | 57.6 <sup>a</sup>        | 44.3 <sup>a</sup>            | 23 <sup>b</sup> ↓ |

↓ Indicates reduction in membrane stability index due to the salt stress. Means followed by different *lowercase letters* in a *column* (separately for shoot and root) are significantly different ( $P \leq 0.05$ ) by Fisher's LSD test.

**Supplementary Table S3.** Effect of salt stress (200 mM NaCl for 14 d) on mineral composition (mg/g DW) in shoot and root of the wheat genotypes.

| Genotype    | Shoot                   |                         | Na <sup>+</sup>         |                         | K <sup>+</sup>         |                        | Ca <sup>2+</sup>       |                        | Mg <sup>2+</sup> |         |
|-------------|-------------------------|-------------------------|-------------------------|-------------------------|------------------------|------------------------|------------------------|------------------------|------------------|---------|
|             | Control                 | Treated                 | Control                 | Treated                 | Control                | Treated                | Control                | Treated                | Control          | Treated |
| KRL-210     | 3.33±0.39 <sup>b</sup>  | 24.66±1.73 <sup>a</sup> | 60.13±2.36 <sup>a</sup> | 53.63±2.17 <sup>b</sup> | 1.86±0.19 <sup>b</sup> | 1.52±0.08 <sup>c</sup> | 0.74±0.03 <sup>a</sup> | 0.71±0.04 <sup>a</sup> |                  |         |
| Kharchia-65 | 2.13±0.29 <sup>a</sup>  | 21.76±1.66 <sup>a</sup> | 62.67±2.67 <sup>a</sup> | 55.13±1.99 <sup>b</sup> | 2.07±0.13 <sup>b</sup> | 1.78±0.09 <sup>d</sup> | 0.83±0.06 <sup>b</sup> | 0.81±0.05 <sup>b</sup> |                  |         |
| HD-2329     | 3.13±0.33 <sup>b</sup>  | 41.87±1.99 <sup>b</sup> | 58.37±1.76 <sup>a</sup> | 41.67±1.67 <sup>a</sup> | 1.43±0.11 <sup>a</sup> | 1.21±0.06 <sup>a</sup> | 0.66±0.05 <sup>a</sup> | 0.62±0.04 <sup>a</sup> |                  |         |
| WH-542      | 2.13±0.36 <sup>a</sup>  | 39.33±1.66 <sup>b</sup> | 59.37±2.31 <sup>a</sup> | 43.67±1.93 <sup>a</sup> | 1.59±0.09 <sup>a</sup> | 1.36±0.05 <sup>b</sup> | 0.72±0.03 <sup>a</sup> | 0.71±0.05 <sup>a</sup> |                  |         |
| <b>Root</b> |                         |                         |                         |                         |                        |                        |                        |                        |                  |         |
| KRL-210     | 10.66±1.09 <sup>a</sup> | 12.33±1.13 <sup>b</sup> | 46.67±1.91 <sup>a</sup> | 40.16±1.13 <sup>b</sup> | 2.13±0.26 <sup>a</sup> | 1.69±0.17 <sup>b</sup> | 0.76±0.09 <sup>a</sup> | 0.71±0.06 <sup>a</sup> |                  |         |
| Kharchia-65 | 8.67±0.93 <sup>a</sup>  | 9.63±0.97 <sup>a</sup>  | 49.26±1.79 <sup>a</sup> | 41.67±1.17 <sup>b</sup> | 2.43±0.29 <sup>b</sup> | 1.75±0.16 <sup>b</sup> | 0.81±0.06 <sup>b</sup> | 0.79±0.04 <sup>b</sup> |                  |         |
| HD-2329     | 10.98±1.19 <sup>a</sup> | 35.33±1.33 <sup>d</sup> | 46.46±1.89 <sup>a</sup> | 32.32±1.49 <sup>a</sup> | 1.76±0.18 <sup>a</sup> | 1.14±0.11 <sup>a</sup> | 0.67±0.07 <sup>a</sup> | 0.62±0.03 <sup>a</sup> |                  |         |
| WH-542      | 9.39±0.96 <sup>a</sup>  | 27.63±1.03 <sup>c</sup> | 46.23±1.76 <sup>a</sup> | 33.63±1.25 <sup>a</sup> | 1.93±0.19 <sup>a</sup> | 1.27±0.13 <sup>a</sup> | 0.71±0.05 <sup>a</sup> | 0.69±0.04 <sup>a</sup> |                  |         |

The values are mean of three replications. Means ±SD followed by different *lowercase letters* in a *column* (separately for shoot and root) are significantly different ( $P \leq 0.05$ ) by Fisher's LSD test.

**Supplementary Figure S1.** Alignment of bisulfite sequences of *TaHKT2;3* gene along with the reference (unmodified) DNA sequences in shoot (Sh) and root (Rt) of Kharchia-65 (Kh) and HD-2329 (HD) grown under control (C) and salt stress (T) conditions.

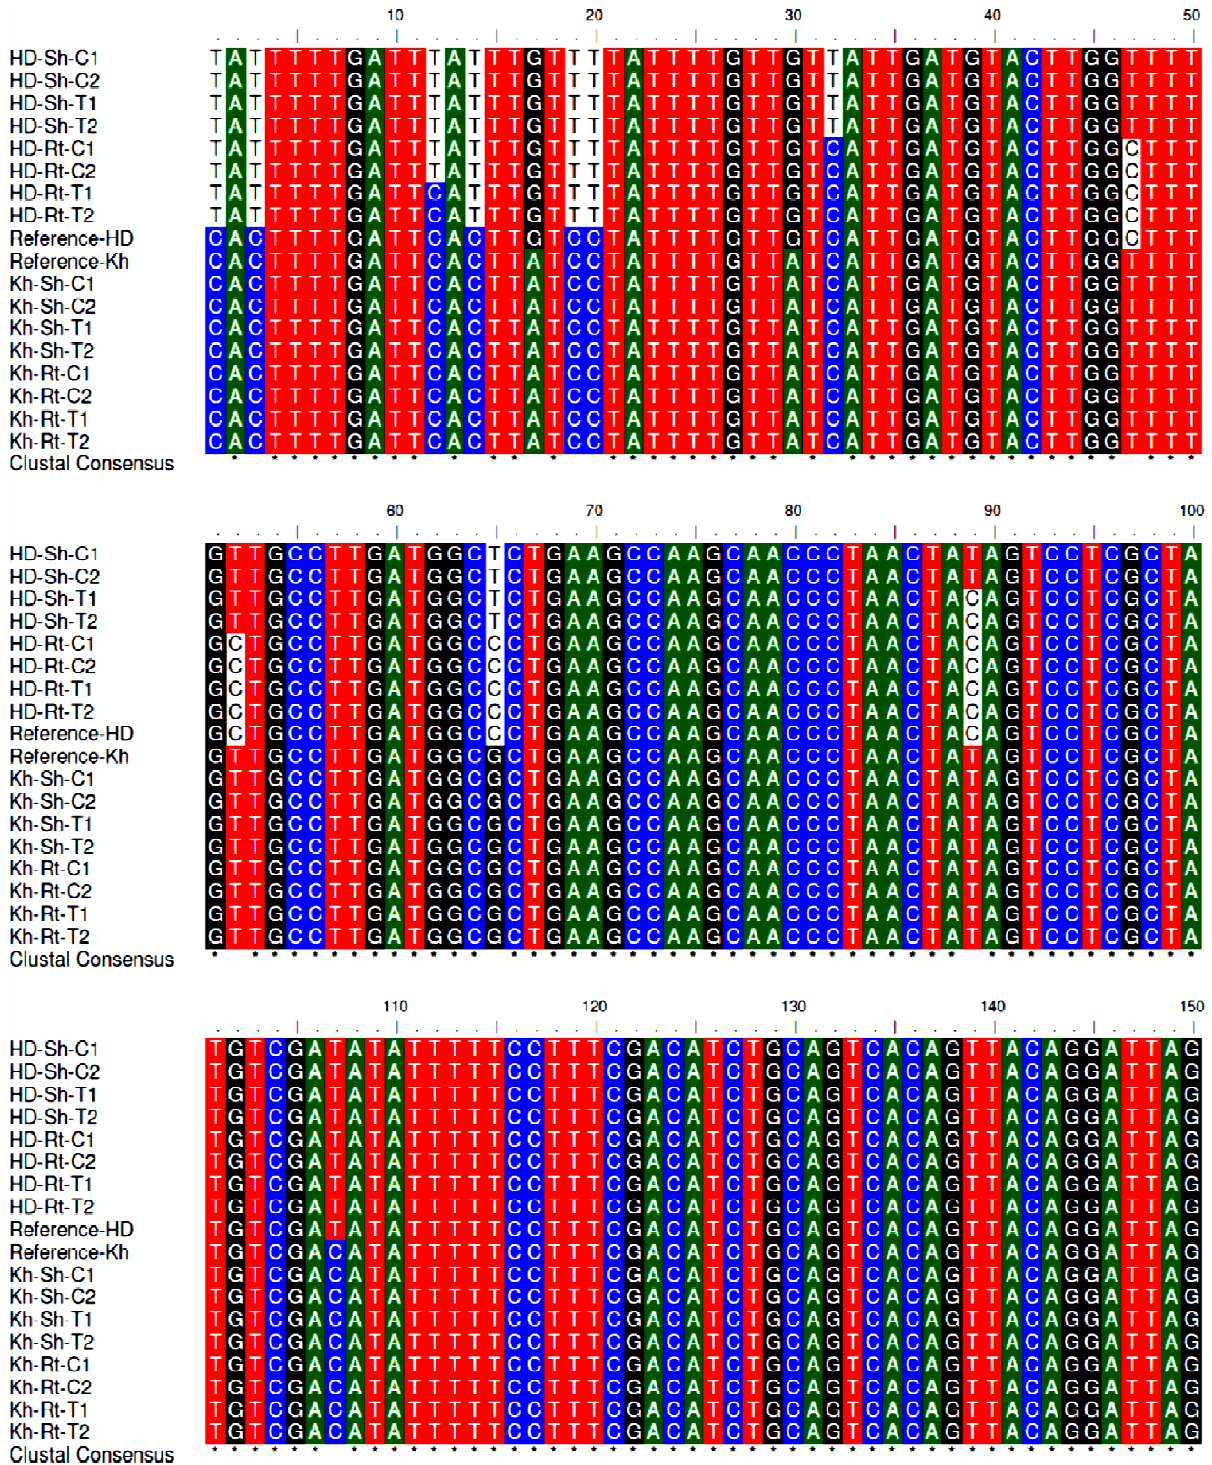

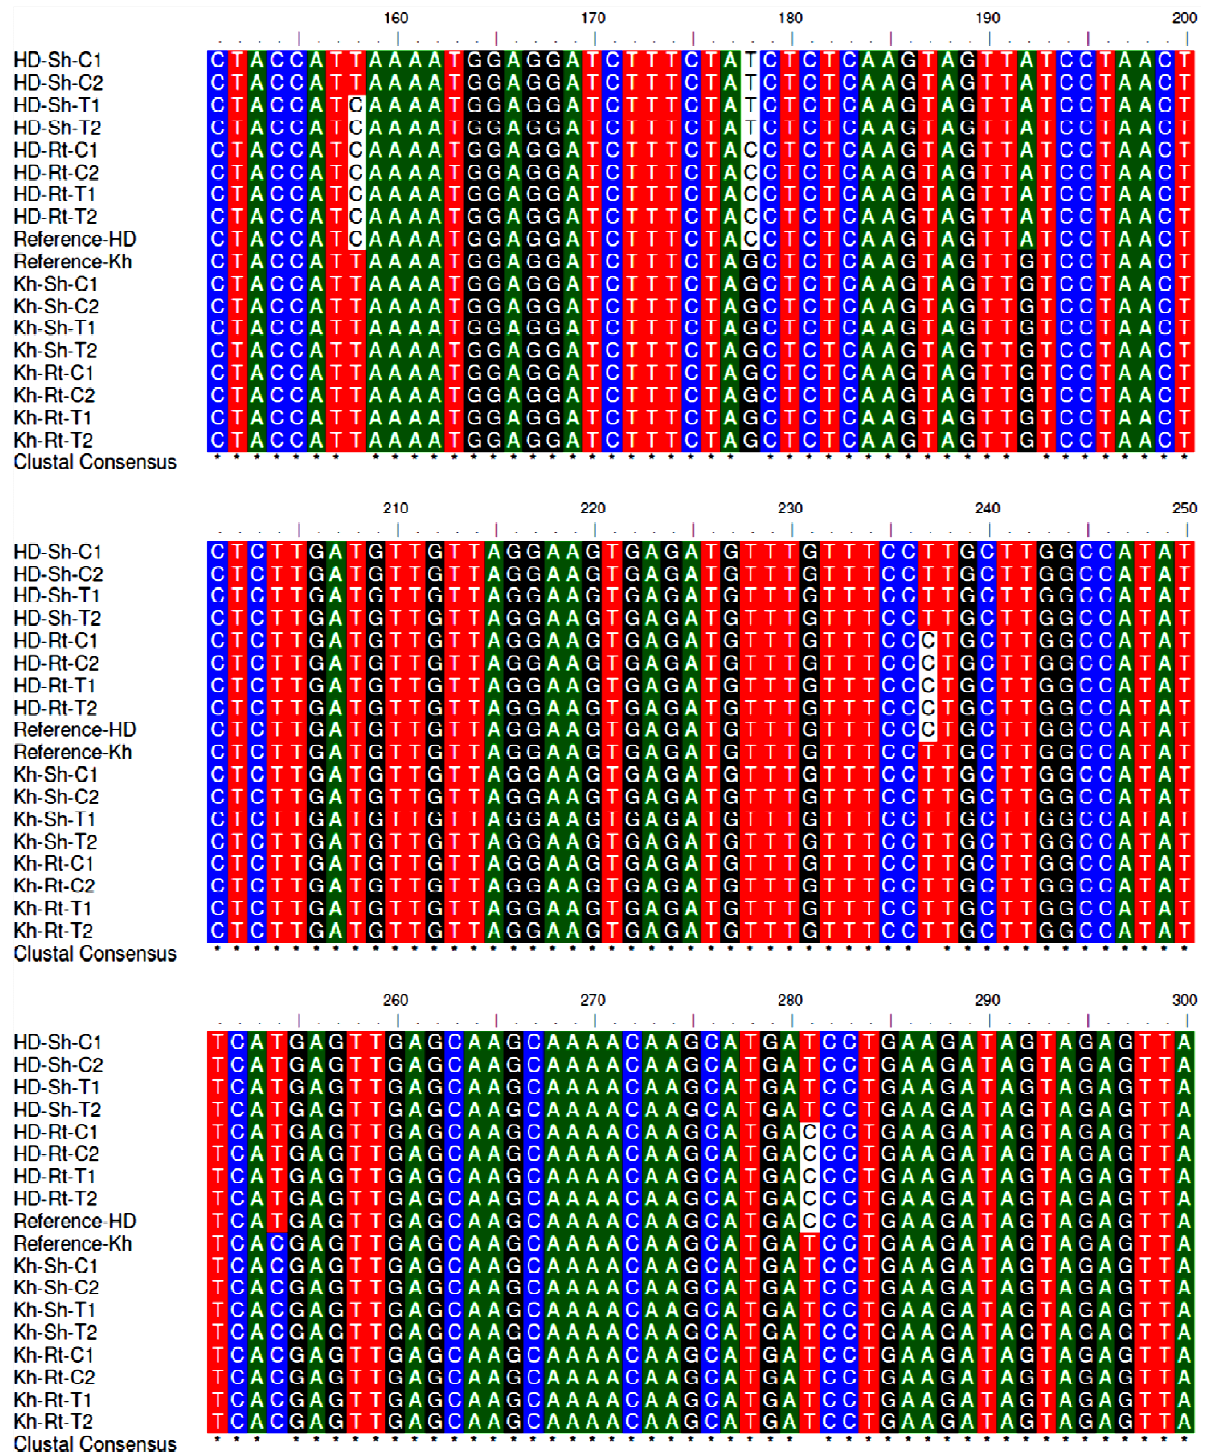

Alignment of only two bisulfate sequencing results for each sample (only 1 – 300 bases) has been presented for the convenience of visualization.
